# Supplementary material for: Geological and experimental evidence of bioavailable phosphite during the Great Oxygenation Event
Source: Research Square preprint supplement (doi:10.21203/rs.3.rs-5118430/v1), 2024-12-09
Supplement: Supplementary file 1 [file 63d01c62b4fa3722f6b9fc38.xlsx]

## Sheet: Sheet1
Samples	Location	IC-ICPMS (EDTA-NaOH extract)										ICPMS/ICP-OES (whole rock)
		PO2 (ppb)	Avg PO3 (ppb)	Avg PO3 (ppm)	SD PO3 (ppb)	Avg PO4 (ppb)	Avg PO4 (ppm)	SD PO4 (ppb)	Avg P2O7 (ppb)	Avg P2O7 (ppm)	SD P2O7 (ppb)	Fe (wt%)	P (ppm)
BIF 6-4	Kuruman Iron Formation, South Africa	BDL	370.161	0.370161	24.5712	1590.04	1.59004	546.749	125.806	0.125806	14.6275	35.3	70
BIF 6-14		BDL	323.229	0.323229	6.06521	7676.44	7.67644	1789.02	281.273	0.281273	102.862	26.8	260
BIF 6-29		BDL	205.778	0.205778	40.9864	11473.6	11.4736	646.45	77.1874	0.0771874	44.8963	38.8	600
BIF 6-39		BDL	360.395	0.360395	98.8023	5250.12	5.25012	433.654	273.988	0.273988	39.999	41.5	130
BIF 6-55		BDL	228.823	0.228823	88.7837	28425.2	28.4252	4712.33	263.252	0.263252	42.3999	22.8	950
BIF 6-79		BDL	315.008	0.315008	160.177	7019.51	7.01951	1791.29	108.789	0.108789	118.495	44.3	300
BIF 6-100		BDL	224.157	0.224157	32.8294	9572.83	9.57283	1143.07	179.785	0.179785	55.324	44.8	240
WRLI-1	Marra Mamba, Hamersley Group, Western Australia	BDL	234.35	0.23435	35.6791	4123.13	4.12313	666.581	37.0844	0.0370844	17.0899	43.6	320
WRLI-3		BDL	241.869	0.241869	36.6158	10078.1	10.0781	496.88	30.1617	0.0301617	4.07775	30.4	1090
WRLI-4		BDL	344.639	0.344639	126.04	3317.62	3.31762	73.4969	87.3631	0.0873631	1.76788	50	160
WRLI-7		BDL	246.681	0.246681	104.402	11616.6	11.6166	685.21	285.953	0.285953	73.1571	36.8	800
DGMI-1	Dales Gorge Member, Brockman Iron Formation, Hamersley Group, Western Australia	BDL	406.312	0.406312	60.1229	60645.2	60.6452	4414.52	265.013	0.265013	9.92748	34.3	3720
DGMI-2		BDL	559.534	0.559534	257.676	17891.7	17.8917	14454.9	606.128	0.606128	309.463	48.7	210
DGMI-6		BDL	152.642	0.152642	59.5248	2711.55	2.71155	207.833	215.202	0.215202	34.0883	50	110
DGMI-7		BDL	319.133	0.319133	201.489	5179.71	5.17971	3004.99	246.358	0.246358	187.701	29.6	190
DGMI-8		BDL	265.146	0.265146	336.737	13136.7	13.1367	10514.9	97.9558	0.0979558	103.175	44.6	820
DGMI-16		50	497.185	0.497185	328.149	1587	1.587	855.682	362.765	0.362765	97.7291	45.7	20
DD-98-2	Joffre Member, Brockman Iron Formation, Hamersley Group, Western Australia	BDL	18.5966	0.0185966	7.81416	7508	7.508	3812.28	BDL	BDL	BDL	27.4	20
DD-98-7		BDL	30.4178	0.0304178	13.2582	7359.85	7.35985	5854.8	BDL	BDL	BDL	34.7	50
DD-98-19B		BDL	42.5317	0.0425317	33.8664	15392.7	15.3927	3067.07	BDL	BDL	BDL	32.1	110
DD-98-27		BDL	52.7023	0.0527023	56.6421	2213.14	2.21314	295.842	BDL	BDL	BDL	32.7	20
