# Supplementary material for: Geological and experimental evidence of bioavailable phosphite during the Great Oxygenation Event
Source: Research Square preprint supplement (doi:10.21203/rs.3.rs-5118430/v1), 2024-12-09
Supplement: Supplementary file 2 [file e82594e04a01d9f5164a4725.xlsx]

## Sheet: PO4 adsorption data
PO4 adsorption in DI water
Solution chemistry					End pH	Initial concentrations in the solution		Concentration in the solution after adsorption					Concentration in the solid precipitate
Solute	NaCl (mM)	CaCl2 (mM)	MgCl2 (mM)	Si(aq)		PO4 (uM)	Fe(II) uM	AVG PO4 (uM)	SD PO4 (uM)	Blank corrected P (uM)	AVG Fe (uM)	SD Fe (uM)	AVG PO4 (uM)	SD PO4 (uM)	Blank corrected P (uM)	AVG Fe (uM)	SD Fe (uM)	Avg Molar P/Fe	SD Molar P/Fe	Molar P/Fe with blank correction
DI water	0	0	0	0	8±0.2	1	200	0.0878474	0.0131317	0.052303	0.0505512	0.00863234	0.912153	0.0131317	0.947697	199.949	0.00863234	0.00456192	6.56752e-05	0.00473968
						2	200	0.122167	0.0321141	0.0866223	0.109969	0.0739819	1.87783	0.0321141	1.91338	199.89	0.0739819	0.00939433	0.000160696	0.00957215
						3	200	0.0491812	0.0203456	0.0136368	26.8943	34.4189	2.95082	0.0203456	2.98636	173.106	34.4189	0.0170463	0.00339139	0.0172517
						4	200	1.16584	0.00792179	1.13029	0.24002	0.114859	2.83416	0.00792179	2.86971	199.76	0.114859	0.0141878	4.04869e-05	0.0143658
						5	200	0.611178	0.132877	0.575634	0.0634173	0.00521803	4.38882	0.132877	4.42437	199.937	0.00521803	0.0219511	0.000664595	0.0221288
						6	200	1.06224	0.127356	1.02669	1.19226	1.44119	4.93776	0.127356	4.97331	198.808	1.44119	0.0248369	0.000665421	0.0250157
						7	200	1.19651	0.0759848	1.16097	1.68407	0.335215	5.80349	0.0759848	5.83903	198.316	0.335215	0.0292639	0.00038633	0.0294431
						8	200	2.08598	0.532219	2.05044	1.83672	0.519834	5.91402	0.532219	5.94956	198.163	0.519834	0.0298442	0.0026869	0.0300235
						9	200	1.40398	0.233292	1.36843	0.0779081	0.0478048	7.59602	0.233292	7.63157	199.922	0.0478048	0.0379949	0.00116695	0.0381727
						10	200	2.20786	0.224687	2.17232	0.267994	0.0175441	7.79214	0.224687	7.82768	199.732	0.0175441	0.039013	0.00112495	0.0391909
						12	200	2.9114	0.668162	2.87586	2.73486	3.7003	9.0886	0.668162	9.12414	197.265	3.7003	0.046073	0.00349564	0.0462532
						14	200	3.42232	0.136723	3.38677	0.113059	0.0406812	10.5777	0.136723	10.6132	199.887	0.0406812	0.0529183	0.000684085	0.0530962
						16	200	4.39096	0.459966	4.35541	4.00014	1.68428	11.609	0.459966	11.6446	196	1.68428	0.0592298	0.00240133	0.0594112
						20	200	6.1811	0.167405	6.14555	6.10394	2.46527	13.8189	0.167405	13.8544	193.896	2.46527	0.0712697	0.00125161	0.071453
						24	200	10.3084	1.0828	10.2729	3.0629	2.47579	13.6916	1.0828	13.7271	196.937	2.47579	0.0695227	0.00556724	0.0697032
						28	200	14.7856	0.667755	14.7501	39.5103	3.21515	13.2144	0.667755	13.2499	160.49	3.21515	0.082338	0.00447578	0.0825595
PO4 adsorption in 0.1X seawater
Solution Chemistry					End pH	Initial concentrations in the solution		Concentration in the solution after adsorption					Concentration in the solid precipitate
Solute	NaCl (mM)	CaCl2 (mM)	MgCl2 (mM)	Si(aq)		PO4 (uM)	Fe(II) uM	AVG PO4 (uM)	SD PO4 (uM)	Blank corrected P (uM)	AVG Fe (uM)	SD Fe (uM)	AVG PO4 (uM)	SD PO4 (uM)	Blank corrected P (uM)	AVG Fe (uM)	SD Fe (uM)	Avg P/Fe	SD P/Fe	Molar P/Fe with blank correction
DI water	56	5.5	4.5	0	8±0.2	2	200	0.400624	0.179015	0.0588513	0.324482	0.102123	1.59938	0.179015	1.94115	199.676	0.102123	0.00801011	0.000900625	0.00972152
						4	200	0.871736	0.259771	0.529964	0.112795	0.0249549	3.12826	0.259771	3.47004	199.887	0.0249549	0.0156501	0.00129763	0.01736
						6	200	0.447537	0.0950082	0.105764	0.169711	0.0655411	5.55246	0.0950082	5.89424	199.83	0.0655411	0.027786	0.000484558	0.0294962
						8	200	0.378154	0.108735	0.0363813	0.169667	0.000728327	7.62185	0.108735	7.96362	199.83	0.000728327	0.0381416	0.000544276	0.0398519
						10	200	0.469891	0.249089	0.128118	0.0798412	0.0291944	9.53011	0.249089	9.87188	199.92	0.0291944	0.0476695	0.00123898	0.0493791
						12	200	0.613946	0.154022	0.272173	0.0658579	0.0286635	11.3861	0.154022	11.7278	199.934	0.0286635	0.056949	0.000762198	0.0586584
						16	200	1.49638	0.210695	1.15461	0.171057	0.153382	14.5036	0.210695	14.8454	199.829	0.153382	0.0725806	0.00111009	0.0742905
						20	200	1.86636	0.0651619	1.52459	0.093687	0.0173804	18.1336	0.0651619	18.4754	199.906	0.0173804	0.0907107	0.000318075	0.0924203
						24	200	3.29194	0.0525262	2.95017	0.132856	0.0214972	20.7081	0.0525262	21.0498	199.867	0.0214972	0.103609	0.000251662	0.105319
						28	200	3.96582	0.421509	3.62405	0.119244	0.100654	24.0342	0.421509	24.376	199.881	0.100654	0.120243	0.00216935	0.121952

## Sheet: PO3 adsorption data
PO3 adsorption in DI water
Solution chemistry					End pH	Initial concentrations in the solution		Concentration in the solution after adsorption				Concentration in the solid precipitate
Solute	NaCl (mM)	CaCl2 (mM)	MgCl2 (mM)	Si(aq)		P (uM)	Fe(II) uM	Blank corrected Avg P (uM)	Blank corrected SD P (uM)	AVG Fe (uM)	SD Fe (uM)	Blank corrected P (uM)	Blank corrected SD PO4 (uM)	AVG Fe (uM)	SD Fe (uM)	Avg Molar P/Fe with blank correction	SD Molar P/Fe with Blank correction
DI water	0	0	0	0	8±0.2	1	200	0.637163	0.159414	0.1801	0.0334322	0.362837	0.159414	199.82	0.0334322	0.00181582	0.000797789
						2	200	1.4061	0.0228026	0.238302	0.1135	0.593903	0.0228026	199.762	0.1135	0.00297306	0.000114161
						4	200	3.3357	0.193822	0.190628	0.089961	0.664298	0.193822	199.809	0.089961	0.00332466	0.000970038
						5	200	4.37688	0.14064	0.215589	0.0361105	0.623115	0.14064	199.784	0.0361105	0.00311894	0.000703958
						6	200	5.25528	0.178064	0.440666	0.0925263	0.74472	0.178064	199.559	0.0925263	0.00373182	0.000892286
PO3 adsorption in 0.1x seawater
Solution chemistry					End pH	Initial concentrations in the solution		Concentration in the solution after adsorption				Concentration in the solid precipitate
Solute	NaCl (mM)	CaCl2 (mM)	MgCl2 (mM)	Si(aq)		P (uM)	Fe(II) uM	Blank corrected Avg P (uM)	Blank corrected SD P (uM)	AVG Fe (uM)	SD Fe (uM)	Blank corrected P (uM)	Blank corrected SD PO4 (uM)	AVG Fe (uM)	SD Fe (uM)	Avg Molar P/Fe with blank correction	SD Molar P/Fe with Blank correction
DI water	56	5.5	4.5	0	8±0.2	2	200	1.6813	0.164811	0.0761399	0.0387149	0.318703	0.164811	199.924	0.0387149	0.0015942	0.000824678
						4	200	3.38077	0.23667	0.0492228	0.0110008	0.619227	0.23667	199.951	0.0110008	0.00309693	0.00118381
						5	200	4.72595	0.413846	0.135971	0.105274	0.274048	0.413846	199.864	0.105274	0.00137063	0.00206992
						6	200	5.31337	0.344605	0.0692437	0.00307159	0.686635	0.344605	199.931	0.00307159	0.00343438	0.00172367
						8	200	6.89959	0.299501	0.0736402	0.0572248	1.10041	0.299501	199.926	0.0572248	0.00550384	0.00149648
						10	200	8.45526	0.204145	0.0814479	0.0488746	1.54474	0.204145	199.919	0.0488746	0.007727	0.00102303
						12	200	9.82787	0.090546	0.0732124	0.0438438	2.17213	0.090546	199.927	0.0438438	0.0108646	0.000450513
PO3 adsorption in seawater without silica
Solution chemistry					End pH	Initial concentrations in the solution		Concentration in the solution after adsorption				Concentration in the solid precipitate
Solute	NaCl (mM)	CaCl2 (mM)	MgCl2 (mM)	Si(aq)		P (uM)	Fe(II) uM	Blank corrected Avg P (uM)	Blank corrected SD P (uM)	AVG Fe (uM)	SD Fe (uM)	Blank corrected P (uM)	Blank corrected SD PO4 (uM)	AVG Fe (uM)	SD Fe (uM)	Avg Molar P/Fe with blank correction	SD Molar P/Fe with Blank correction
DI water	560	55	45	0	8±0.2	2	200	1.76774	0.111028	0.679359	0.636831	0.232261	0.111028	199.321	0.636831	0.00116438	0.000553311
						4	200	3.53955	Not Available	0.0537409	Not Available	0.460455	Not Available	199.946	Not Available	0.00230289	Not Available
						6	200	5.62464	0.336964	0.226468	0.320275	0.375362	0.336964	199.774	0.320275	0.00188029	0.00168975
						8	200	7.02205	0.31248	1.136	0.777021	0.977951	0.31248	198.864	0.777021	0.0049208	0.00159055
						10	200	8.56225	0.273462	0.366334	0.518074	1.43775	0.273462	199.634	0.518074	0.00720018	0.00135113
						12	200	10.5101	0.672419	0.322253	0.0773936	1.48995	0.672419	199.678	0.0773936	0.00746242	0.00337041
PO3 adsorption in seawater silica
Solution chemistry					End pH	Initial concentrations in the solution		Concentration in the solution after adsorption				Concentration in the solid precipitate
Solute	NaCl (mM)	CaCl2 (mM)	MgCl2 (mM)	Si(aq) (mM)		P (uM)	Fe(II) uM	Blank corrected Avg P (uM)	Blank corrected SD P (uM)	AVG Fe (uM)	SD Fe (uM)	Blank corrected P (uM)	Blank corrected SD PO4 (uM)	AVG Fe (uM)	SD Fe (uM)	Avg Molar P/Fe with blank correction	SD Molar P/Fe with Blank correction	Avg mass P/Fe with blank correction
DI water	560	55	45	2.2	8±0.2	2	200	1.68155	0.0530226	0.510845	0.0869624	0.318454	0.0530226	199.489	0.0869624	0.00159635	0.000265793	0.000883691
						4	200	3.5889	0.398057	0.351597	0.0866392	0.411096	0.398057	199.648	0.0866392	0.0020591	0.00199379	0.00113986
						6	200	5.21782	0.215579	0.662833	0.607465	0.782179	0.215579	199.337	0.607465	0.0039239	0.00108155	0.00217216
						8	200	6.54412	Not Available	0.734173	0.7071	1.45588	Not Available	199.266	0.7071	0.00730623	Not Avaialble	0.00404452
						10	200	6.85185	0.24262	0.319661	0.0460796	3.14815	0.24262	199.68	0.0460796	0.015766	0.00121504	0.00872759
						12	200	8.34177	0.0953924	0.574111	0.22103	3.65823	0.0953924	199.426	0.22103	0.0183438	0.000478767	0.0101546
																		mol ratio:	1.80645
